# Supplementary material for: A Type I Restriction Modification System Influences Genomic Evolution Driven by Horizontal Gene Transfer in Paenibacillus polymyxa
Source: Front Microbiol. 2021 Aug 3;12:709571. doi: 10.3389/fmicb.2021.709571 (PMC8370563; doi:10.3389/fmicb.2021.709571)
Supplement: Supplementary file 2 [file Table_1.xlsx]

## Sheet: Sheet1
protein id	protein length	genome accession	gene name	gene description
CUU60_00105	426	CP024795	albE	insulinase family protein
CUU60_17065	292	CP024795	alsR	LysR family transcriptional regulator
CUU60_01820	533	CP024795	amyE	alpha-amylase
CUU60_25515	383	CP024795	araM	sn-glycerol-1-phosphate dehydrogenase
CUU60_20385	493	CP024795	asnH	amidophosphoribosyltransferase
CUU60_20725	138	CP024795	bmrR	MerR family transcriptional regulator
CUU60_18375	818	CP024795	copZ	copper-translocating P-type ATPase
CUU60_25700	65	CP024795	cspC	cold shock domain-containing protein
CUU60_19025	481	CP024795	cssS	sensor histidine kinase
CUU60_02330	220	CP024795	czrA	ArsR family transcriptional regulator
CUU60_26855	1438	CP024795	dnaE	PolC-type DNA polymerase III
CUU60_22130	395	CP024795	epsF	glycosyltransferase family 1 protein
CUU60_10275	458	CP024795	folC	bifunctional folylpolyglutamate synthase/dihydrofolate synthase
CUU60_19590	399	CP024795	gerKC	Ger(x)C family spore germination protein
CUU60_20455	557	CP024795	glnJ	sensor histidine kinase
CUU60_19830	151	CP024795	glnR	MerR family transcriptional regulator
CUU60_00490	297	CP024795	gntZ	6-phosphogluconate dehydrogenase (decarboxylating)
CUU60_15250	588	CP024795	kinD	sensor histidine kinase
CUU60_23330	277	CP024795	licT	transcription antiterminator LicT
CUU60_10270	459	CP024795	murF	UDP-N-acetylmuramate--L-alanine ligase
CUU60_25705	471	CP024795	norM	MATE family efflux transporter
CUU60_15610	527	CP024795	oppA	peptide ABC transporter substrate-binding protein
CUU60_22385	654	CP024795	oppF	multidrug ABC transporter ATP-binding protein
CUU60_25670	649	CP024795	opuAA	ABC transporter ATP-binding protein
CUU60_22965	753	CP024795	pnpA	RNA-binding transcriptional accessory protein
CUU60_11755	191	CP024795	sigV	RNA polymerase subunit sigma
CUU60_21835	157	CP024795	sinR	transcriptional regulator
CUU60_16190	117	CP024795	slrR	XRE family transcriptional regulator
CUU60_26945	357	CP024796	spoIIQ	hypothetical protein
CUU60_25245	74	CP024795	sspD	acid-soluble spore protein
CUU60_23715	512	CP024795	vmlR	ABC transporter ATP-binding protein
CUU60_02475	288	CP024795	ybbH	MurR/RpiR family transcriptional regulator
CUU60_08830	332	CP024795	ybfI	AraC family transcriptional regulator
CUU60_19360	133	CP024795	ybgA	GntR family transcriptional regulator
CUU60_07800	469	CP024795	ycgH	amino acid permease
CUU60_14500	291	CP024795	yckB	amino acid ABC transporter substrate-binding protein
CUU60_12360	381	CP024795	yczG	12-oxophytodienoate reductase
CUU60_16150	222	CP024795	ydeS	TetR family transcriptional regulator
CUU60_01370	286	CP024795	yesF	ergot alkaloid biosynthesis protein
CUU60_24045	616	CP024795	yfiC	ABC transporter ATP-binding protein
CUU60_23230	193	CP024795	yfiR	TetR/AcrR family transcriptional regulator
CUU60_26220	151	CP024795	yfiV	MarR family transcriptional regulator
CUU60_22935	331	CP024795	yfmC	ferrichrome ABC transporter substrate-binding protein
CUU60_25785	155	CP024795	yfmP	transcriptional regulator
CUU60_16170	153	CP024795	yhbI	MarR family transcriptional regulator
CUU60_02455	303	CP024795	yisR	AraC family transcriptional regulator
CUU60_26095	186	CP024795	yjcK	N-acetyltransferase
CUU60_12355	122	CP024795	yloB	transcriptional regulator
CUU60_25970	246	CP024795	yobU	transcriptional regulator
CUU60_15975	481	CP024795	yocI	ATP-dependent helicase
CUU60_26315	174	CP024795	yokL	N-acetyltransferase
CUU60_03670	1825	CP024795	yomI	transglycosylase
CUU60_22210	404	CP024795	yqgM	glycosyl transferase
CUU60_10560	573	CP024795	ytsJ	NAD-dependent malic enzyme
CUU60_26285	417	CP024795	yttB	MFS transporter
CUU60_23725	319	CP024795	yufP	ABC transporter permease
CUU60_25500	118	CP024795	yvaP	transcriptional regulator
CUU60_24815	151	CP024795	yxbD	N-acetyltransferase
CUU60_01275	237	CP024795	yxjL	DNA-binding response regulator
CUU60_22825	262	CP024795	yxkH	polysaccharide deacetylase
CUU60_03385	272	CP024795	yyaN	MerR family transcriptional regulator
CUU60_00235	322	CP024795	NA	hypothetical protein
CUU60_00240	696	CP024795	NA	ABC transporter ATP-binding protein
CUU60_00245	585	CP024795	NA	multidrug ABC transporter permease/ATP-binding protein
CUU60_00320	91	CP024795	NA	WXG100 family type VII secretion target
CUU60_00340	269	CP024795	NA	NAD(P)-dependent oxidoreductase
CUU60_00405	331	CP024795	NA	tRNA glutamyl-Q(34) synthetase GluQRS
CUU60_00420	390	CP024795	NA	acyltransferase
CUU60_00430	334	CP024795	NA	gfo/Idh/MocA family oxidoreductase
CUU60_00470	307	CP024795	NA	NAD(P)/FAD-dependent oxidoreductase
CUU60_00500	402	CP024795	NA	MFS transporter
CUU60_00520	208	CP024795	NA	FMN-dependent NADH-azoreductase
CUU60_00540	464	CP024795	NA	MATE family efflux transporter
CUU60_00545	326	CP024795	NA	serine protease
CUU60_00570	466	CP024795	NA	MFS transporter
CUU60_00575	334	CP024795	NA	LacI family transcriptional regulator
CUU60_00610	320	CP024795	NA	sugar ABC transporter permease
CUU60_00620	548	CP024795	NA	ABC transporter substrate-binding protein
CUU60_00625	640	CP024795	NA	sensor histidine kinase
CUU60_00630	266	CP024795	NA	DNA-binding response regulator
CUU60_00665	266	CP024795	NA	Cof-type HAD-IIB family hydrolase
CUU60_00670	296	CP024795	NA	AraC family transcriptional regulator
CUU60_00690	324	CP024795	NA	aldo/keto reductase
CUU60_00705	288	CP024795	NA	LysR family transcriptional regulator
CUU60_00715	289	CP024795	NA	DUF421 domain-containing protein
CUU60_00735	296	CP024795	NA	LysR family transcriptional regulator
CUU60_00745	259	CP024795	NA	amino acid ABC transporter permease
CUU60_00750	236	CP024795	NA	amino acid ABC transporter permease
CUU60_00760	338	CP024795	NA	LLM class flavin-dependent oxidoreductase
CUU60_00785	574	CP024795	NA	ABC transporter substrate-binding protein
CUU60_00790	317	CP024795	NA	ABC transporter permease
CUU60_00795	308	CP024795	NA	ABC transporter permease
CUU60_00800	327	CP024795	NA	ABC transporter ATP-binding protein
CUU60_00805	322	CP024795	NA	ABC transporter ATP-binding protein
CUU60_00840	334	CP024795	NA	hypothetical protein
CUU60_00845	655	CP024795	NA	ATP-dependent DNA helicase
CUU60_00865	376	CP024795	NA	cystathionine gamma-synthase
CUU60_00880	600	CP024795	NA	VWA domain-containing protein
CUU60_00915	155	CP024795	NA	MarR family transcriptional regulator
CUU60_00920	458	CP024795	NA	MFS transporter
CUU60_00945	1156	CP024795	NA	RTX toxin
CUU60_00950	1519	CP024795	NA	RTX toxin
CUU60_00990	362	CP024795	NA	GTP-binding protein
CUU60_00995	370	CP024795	NA	iron ABC transporter permease
CUU60_01000	262	CP024795	NA	ABC transporter ATP-binding protein
CUU60_01010	253	CP024795	NA	metal ABC transporter ATP-binding protein
CUU60_01025	120	CP024795	NA	response regulator
CUU60_01070	158	CP024795	NA	transcriptional regulator
CUU60_01080	689	CP024795	NA	bifunctional rhamnulose-1-phosphate aldolase/short-chain dehydrogenase
CUU60_01095	252	CP024795	NA	DeoR/GlpR transcriptional regulator
CUU60_01115	368	CP024795	NA	two-component sensor histidine kinase
CUU60_01120	233	CP024795	NA	DNA-binding response regulator
CUU60_01125	397	CP024795	NA	acyltransferase
CUU60_01155	387	CP024795	NA	TolC family protein
CUU60_01160	485	CP024795	NA	efflux RND transporter periplasmic adaptor subunit
CUU60_01165	239	CP024795	NA	ABC transporter ATP-binding protein
CUU60_01195	609	CP024795	NA	ABC transporter ATP-binding protein
CUU60_01205	14133	CP024795	NA	non-ribosomal peptide synthetase
CUU60_01210	3735	CP024795	NA	non-ribosomal peptide synthetase
CUU60_01240	384	CP024795	NA	IscS subfamily cysteine desulfurase
CUU60_01265	223	CP024795	NA	phosphatase PAP2 family protein
CUU60_01270	216	CP024795	NA	undecaprenyl-diphosphatase
CUU60_01285	157	CP024795	NA	NlpC/P60 family protein
CUU60_01290	344	CP024795	NA	glycosyltransferase family 4 protein
CUU60_01310	293	CP024795	NA	ATP-binding protein
CUU60_01320	259	CP024795	NA	ABC transporter ATP-binding protein
CUU60_01395	471	CP024795	NA	glycoside hydrolase family 1 protein
CUU60_01425	673	CP024795	NA	2,4-dienoyl-CoA reductase
CUU60_01445	327	CP024795	NA	Fe3+-hydroxamate ABC transporter substrate-binding protein
CUU60_01450	341	CP024795	NA	iron ABC transporter permease
CUU60_01455	335	CP024795	NA	iron ABC transporter permease
CUU60_01465	142	CP024795	NA	VOC family protein
CUU60_01500	402	CP024795	NA	Ger(x)C family spore germination protein
CUU60_01550	221	CP024795	NA	MBL fold metallo-hydrolase
CUU60_01565	241	CP024795	NA	RNA polymerase sigma factor
CUU60_01605	666	CP024795	NA	methyl-accepting chemotaxis protein
CUU60_01610	854	CP024795	NA	hybrid sensor histidine kinase/response regulator
CUU60_01615	230	CP024795	NA	DNA-binding response regulator
CUU60_01630	374	CP024795	NA	GGDEF domain-containing protein
CUU60_01640	67	CP024795	NA	hypothetical protein
CUU60_01660	995	CP024795	NA	cellulose 1,4-beta-cellobiosidase
CUU60_01685	529	CP024795	NA	acyl--CoA ligase
CUU60_01710	175	CP024795	NA	TetR/AcrR family transcriptional regulator
CUU60_01715	196	CP024795	NA	hypothetical protein
CUU60_01735	368	CP024795	NA	spore gernimation protein
CUU60_01740	400	CP024795	NA	Ger(x)C family spore germination protein
CUU60_01745	539	CP024795	NA	spore germination protein
CUU60_01785	758	CP024795	NA	alpha-galactosidase
CUU60_01790	332	CP024795	NA	transcriptional regulator
CUU60_01795	602	CP024795	NA	two-component sensor histidine kinase
CUU60_01800	368	CP024795	NA	DNA-binding response regulator
CUU60_01805	433	CP024795	NA	sugar ABC transporter substrate-binding protein
CUU60_01810	292	CP024795	NA	sugar ABC transporter permease
CUU60_01815	280	CP024795	NA	carbohydrate ABC transporter permease
CUU60_01830	354	CP024795	NA	gfo/Idh/MocA family oxidoreductase
CUU60_01845	142	CP024795	NA	MarR family transcriptional regulator
CUU60_01850	340	CP024795	NA	NADH:flavin oxidoreductase/NADH oxidase
CUU60_01860	264	CP024795	NA	NAD(P)-dependent oxidoreductase
CUU60_01870	461	CP024795	NA	MFS transporter
CUU60_01875	295	CP024795	NA	LysR family transcriptional regulator
CUU60_01880	457	CP024795	NA	MFS transporter
CUU60_01885	354	CP024795	NA	xylanase deacetylase
CUU60_01890	334	CP024795	NA	LacI family transcriptional regulator
CUU60_01895	493	CP024795	NA	glycoside hydrolase
CUU60_01905	228	CP024795	NA	DNA-binding response regulator
CUU60_01910	334	CP024795	NA	L-glyceraldehyde 3-phosphate reductase
CUU60_01940	503	CP024795	NA	PLP-dependent aminotransferase family protein
CUU60_01960	242	CP024795	NA	HAD family phosphatase
CUU60_01965	349	CP024795	NA	dehydrogenase
CUU60_01970	412	CP024795	NA	aspartate aminotransferase family protein
CUU60_01980	253	CP024795	NA	3-oxoacyl-ACP reductase
CUU60_01985	535	CP024795	NA	mannitol dehydrogenase family protein
CUU60_02000	284	CP024795	NA	D-mannonate oxidoreductase
CUU60_02005	270	CP024795	NA	AraC family transcriptional regulator
CUU60_02045	498	CP024795	NA	spore germination protein
CUU60_02050	403	CP024795	NA	Ger(x)C family spore germination protein
CUU60_02080	135	CP024795	NA	MarR family transcriptional regulator
CUU60_02090	616	CP024795	NA	ABC transporter ATP-binding protein
CUU60_02110	649	CP024795	NA	fusaricidin synthetase
CUU60_02115	635	CP024795	NA	arabinoxylan arabinofuranohydrolase
CUU60_02130	269	CP024795	NA	transcriptional regulator
CUU60_02135	246	CP024795	NA	DNA-binding response regulator
CUU60_02145	680	CP024795	NA	serine hydrolase
CUU60_02150	335	CP024795	NA	LacI family transcriptional regulator
CUU60_02155	411	CP024795	NA	MFS transporter
CUU60_02160	492	CP024795	NA	sucrose-6-phosphate hydrolase
CUU60_02165	337	CP024795	NA	LacI family transcriptional regulator
CUU60_02200	339	CP024795	NA	sensor histidine kinase
CUU60_02205	225	CP024795	NA	DNA-binding response regulator
CUU60_02235	2879	CP024795	NA	hybrid non-ribosomal peptide synthetase/type I polyketide synthase
CUU60_02245	3369	CP024795	NA	non-ribosomal peptide synthetase
CUU60_02250	240	CP024795	NA	thioesterase
CUU60_02290	231	CP024795	NA	DNA-binding response regulator
CUU60_02300	545	CP024795	NA	alpha-glucosidase
CUU60_02310	304	CP024795	NA	sugar ABC transporter permease
CUU60_02315	578	CP024795	NA	sugar ABC transporter substrate-binding protein
CUU60_02320	473	CP024795	NA	DNA-binding response regulator
CUU60_02325	568	CP024795	NA	sensor histidine kinase
CUU60_02335	162	CP024795	NA	osmotically inducible protein OsmC
CUU60_02345	322	CP024795	NA	LacI family transcriptional regulator
CUU60_02355	217	CP024795	NA	ArsR family transcriptional regulator
CUU60_02370	275	CP024795	NA	alcohol dehydrogenase
CUU60_02380	219	CP024795	NA	nitroreductase family protein
CUU60_02415	368	CP024795	NA	gfo/Idh/MocA family oxidoreductase
CUU60_02445	329	CP024795	NA	aldo/keto reductase
CUU60_02460	125	CP024795	NA	hypothetical protein
CUU60_02465	331	CP024795	NA	gfo/Idh/MocA family oxidoreductase
CUU60_02470	339	CP024795	NA	NAD(P)-dependent oxidoreductase
CUU60_02480	101	CP024795	NA	ArsR family transcriptional regulator
CUU60_02485	387	CP024795	NA	MFS transporter
CUU60_02495	235	CP024795	NA	lantibiotic ABC transporter ATP-binding protein
CUU60_02510	219	CP024795	NA	DNA-binding response regulator
CUU60_02515	462	CP024795	NA	sensor histidine kinase
CUU60_02520	445	CP024795	NA	MFS transporter
CUU60_02535	679	CP024795	NA	peptidase
CUU60_02555	189	CP024795	NA	TetR/AcrR family transcriptional regulator
CUU60_02560	490	CP024795	NA	MFS transporter
CUU60_02570	314	CP024795	NA	ABC transporter permease
CUU60_02580	278	CP024795	NA	ABC transporter ATP-binding protein
CUU60_02585	280	CP024795	NA	ABC transporter ATP-binding protein
CUU60_02645	179	CP024795	NA	DNA-binding protein
CUU60_02655	373	CP024795	NA	exopolysaccharide biosynthesis protein
CUU60_02670	514	CP024795	NA	2-isopropylmalate synthase
CUU60_02695	410	CP024795	NA	aminopeptidase
CUU60_02715	444	CP024795	NA	HlyC/CorC family transporter
CUU60_02750	463	CP024795	NA	amino acid permease
CUU60_02755	309	CP024795	NA	L-lactate dehydrogenase
CUU60_02770	573	CP024795	NA	ABC transporter ATP-binding protein
CUU60_02775	612	CP024795	NA	ABC transporter ATP-binding protein
CUU60_02790	301	CP024795	NA	ROK family protein
CUU60_02805	333	CP024795	NA	ROK family protein
CUU60_02810	318	CP024795	NA	recombinase XerC
CUU60_02820	348	CP024795	NA	iron ABC transporter permease
CUU60_02825	354	CP024795	NA	iron ABC transporter permease
CUU60_02830	326	CP024795	NA	ABC transporter
CUU60_02835	571	CP024795	NA	ABC transporter ATP-binding protein
CUU60_02840	335	CP024795	NA	Fe3+-hydroxamate ABC transporter substrate-binding protein
CUU60_02855	493	CP024795	NA	sugar ABC transporter ATP-binding protein
CUU60_02880	262	CP024795	NA	3-oxoacyl-ACP reductase
CUU60_02885	303	CP024795	NA	copper amine oxidase
CUU60_02895	1023	CP024795	NA	xyloglucanase
CUU60_02940	182	CP024795	NA	hypothetical protein
CUU60_02970	222	CP024795	NA	phage shock protein A
CUU60_02975	340	CP024795	NA	NADH:flavin oxidoreductase/NADH oxidase
CUU60_02980	268	CP024795	NA	polysaccharide deacetylase family protein
CUU60_02995	487	CP024795	NA	amino acid ABC transporter substrate-binding protein
CUU60_03025	476	CP024795	NA	sensor histidine kinase
CUU60_03030	232	CP024795	NA	DNA-binding response regulator
CUU60_03040	241	CP024795	NA	phosphonate ABC transporter ATP-binding protein
CUU60_03045	385	CP024795	NA	MFS transporter
CUU60_03090	326	CP024795	NA	alpha-ketoacid dehydrogenase subunit beta
CUU60_03115	166	CP024795	NA	NlpC/P60 family protein
CUU60_03120	230	CP024795	NA	DNA-binding response regulator
CUU60_03125	352	CP024795	NA	thiamine biosynthesis protein ThiF
CUU60_03150	517	CP024795	NA	ABC transporter ATP-binding protein
CUU60_03210	497	CP024795	NA	serine/threonine protein kinase
CUU60_03220	257	CP024795	NA	molybdenum ABC transporter ATP-binding protein
CUU60_03265	293	CP024795	NA	haloacid dehalogenase
CUU60_03300	157	CP024795	NA	MarR family transcriptional regulator
CUU60_03305	292	CP024795	NA	short-chain dehydrogenase
CUU60_03310	61	CP024795	NA	hypothetical protein
CUU60_03315	470	CP024795	NA	XRE family transcriptional regulator
CUU60_03335	35	CP024795	NA	sporulation protein YjcZ
CUU60_03340	112	CP024795	NA	QacE family quaternary ammonium compound efflux SMR transporter
CUU60_03345	104	CP024795	NA	QacE family quaternary ammonium compound efflux SMR transporter
CUU60_03365	181	CP024795	NA	GNAT family N-acetyltransferase
CUU60_03380	391	CP024795	NA	MFS transporter
CUU60_03390	68	CP024795	NA	hypothetical protein
CUU60_03415	102	CP024795	NA	DUF2500 domain-containing protein
CUU60_03450	495	CP024795	NA	ABC transporter ATP-binding protein
CUU60_03465	555	CP024795	NA	Fe3+-citrate ABC transporter substrate-binding protein
CUU60_03470	320	CP024795	NA	ABC transporter
CUU60_03480	402	CP024795	NA	IS110 family transposase
CUU60_03500	141	CP024795	NA	hypothetical protein
CUU60_03530	184	CP024795	NA	accessory regulator AgrB
CUU60_03535	216	CP024795	NA	hypothetical protein
CUU60_03540	110	CP024795	NA	YolD-like family protein
CUU60_03555	348	CP024795	NA	fibronectin type III domain-containing protein
CUU60_03565	80	CP024795	NA	hypothetical protein
CUU60_03585	148	CP024795	NA	nuclease
CUU60_03600	114	CP024795	NA	hypothetical protein
CUU60_03620	167	CP024795	NA	holin
CUU60_03785	110	CP024795	NA	hypothetical protein
CUU60_03925	129	CP024795	NA	transcriptional regulator
CUU60_03930	395	CP024795	NA	site-specific integrase
CUU60_03975	1091	CP024795	NA	hypothetical protein
CUU60_04015	218	CP024795	NA	hypothetical protein
CUU60_04100	129	CP024795	NA	hypothetical protein
CUU60_04110	699	CP024795	NA	class 1b ribonucleoside-diphosphate reductase subunit alpha
CUU60_04125	328	CP024795	NA	hypothetical protein
CUU60_04395	127	CP024795	NA	hypothetical protein
CUU60_04490	157	CP024795	NA	peptidylprolyl isomerase
CUU60_04575	165	CP024795	NA	hypothetical protein
CUU60_05030	2454	CP024795	NA	phage tail tape measure protein
CUU60_05095	482	CP024795	NA	hypothetical protein
CUU60_05105	683	CP024795	NA	hypothetical protein
CUU60_05120	289	CP024795	NA	N-acetylmuramoyl-L-alanine amidase
CUU60_05135	471	CP024795	NA	transcriptional regulator
CUU60_05145	204	CP024795	NA	YHYH domain-containing protein
CUU60_05240	298	CP024795	NA	LysR family transcriptional regulator
CUU60_05245	438	CP024795	NA	amino acid permease
CUU60_05260	270	CP024795	NA	ABC transporter ATP-binding protein
CUU60_05320	488	CP024795	NA	efflux RND transporter periplasmic adaptor subunit
CUU60_05325	505	CP024795	NA	MFS transporter
CUU60_05355	500	CP024795	NA	MFS transporter
CUU60_05360	161	CP024795	NA	MarR family transcriptional regulator
CUU60_05365	156	CP024795	NA	MarR family transcriptional regulator
CUU60_05385	358	CP024795	NA	ABC transporter ATP-binding protein
CUU60_05415	612	CP024795	NA	ABC transporter ATP-binding protein
CUU60_05420	591	CP024795	NA	ABC transporter ATP-binding protein
CUU60_05425	1222	CP024795	NA	GTPase
CUU60_05430	181	CP024795	NA	glutathione peroxidase
CUU60_05450	499	CP024795	NA	N-acetylmuramoyl-L-alanine amidase
CUU60_05455	524	CP024795	NA	cwlu
CUU60_05470	949	CP024795	NA	alpha-amylase
CUU60_05480	720	CP024795	NA	formate dehydrogenase subunit alpha
CUU60_05485	209	CP024795	NA	iron-sulfur protein
CUU60_05500	471	CP024795	NA	aspartate ammonia-lyase
CUU60_05510	470	CP024795	NA	[FeFe] hydrogenase H-cluster radical SAM maturase HydG
CUU60_05525	305	CP024795	NA	LysR family transcriptional regulator
CUU60_05620	431	CP024795	NA	asparagine--tRNA ligase
CUU60_05635	500	CP024795	NA	ATPase
CUU60_05725	289	CP024795	NA	YitT family protein
CUU60_05755	168	CP024795	NA	gamma carbonic anhydrase family protein
CUU60_05855	219	CP024795	NA	aromatic acid decarboxylase
CUU60_05885	90	CP024795	NA	HU family DNA-binding protein
CUU60_05895	505	CP024795	NA	sugar ABC transporter ATP-binding protein
CUU60_05900	371	CP024795	NA	LacI family transcriptional regulator
CUU60_05935	440	CP024795	NA	ribosome biogenesis GTPase Der
CUU60_05940	408	CP024795	NA	30S ribosomal protein S1
CUU60_05980	308	CP024795	NA	polysaccharide deacetylase family protein
CUU60_06005	238	CP024795	NA	DNA-binding response regulator
CUU60_06010	252	CP024795	NA	rRNA pseudouridine synthase
CUU60_06125	397	CP024795	NA	D-alanyl-D-alanine carboxypeptidase
CUU60_06155	165	CP024795	NA	transcriptional repressor
CUU60_06200	328	CP024795	NA	alpha-ketoacid dehydrogenase subunit beta
CUU60_06240	566	CP024795	NA	methyl-accepting chemotaxis protein
CUU60_06280	632	CP024795	NA	1-deoxy-D-xylulose-5-phosphate synthase
CUU60_06415	580	CP024795	NA	hypothetical protein
CUU60_06490	114	CP024795	NA	transcriptional regulator
CUU60_06495	243	CP024795	NA	trehalose utilization protein ThuA
CUU60_06505	360	CP024795	NA	gfo/Idh/MocA family oxidoreductase
CUU60_06515	99	CP024795	NA	hypothetical protein
CUU60_06525	272	CP024795	NA	AraC family transcriptional regulator
CUU60_06530	494	CP024795	NA	alpha-N-arabinofuranosidase
CUU60_06545	314	CP024795	NA	gfo/Idh/MocA family oxidoreductase
CUU60_06550	229	CP024795	NA	hypothetical protein
CUU60_06575	234	CP024795	NA	hypothetical protein
CUU60_06595	841	CP024795	NA	carboxypeptidase
CUU60_06610	346	CP024795	NA	NAD(P)-dependent alcohol dehydrogenase
CUU60_06615	141	CP024795	NA	hypothetical protein
CUU60_06625	301	CP024795	NA	AraC family transcriptional regulator
CUU60_06635	279	CP024795	NA	AraC family transcriptional regulator
CUU60_06640	454	CP024795	NA	MFS transporter
CUU60_06650	682	CP024795	NA	DNA helicase RecG
CUU60_06655	288	CP024795	NA	DegV family protein
CUU60_06690	759	CP024795	NA	serine/threonine protein kinase
CUU60_06750	628	CP024795	NA	bifunctional homocysteine S-methyltransferase/methylenetetrahydrofolate reductase
CUU60_06780	324	CP024795	NA	LysR family transcriptional regulator
CUU60_06815	401	CP024795	NA	amidohydrolase
CUU60_06855	661	CP024795	NA	GGDEF domain-containing protein
CUU60_06865	288	CP024795	NA	AraC family transcriptional regulator
CUU60_06880	571	CP024795	NA	acetate--CoA ligase
CUU60_06935	101	CP024795	NA	rhodanese-like domain-containing protein
CUU60_06960	428	CP024795	NA	MFS transporter
CUU60_07005	810	CP024795	NA	nitrite reductase large subunit
CUU60_07020	726	CP024795	NA	nitrite reductase
CUU60_07025	724	CP024795	NA	NAD(P)/FAD-dependent oxidoreductase
CUU60_07045	587	CP024795	NA	methyl-accepting chemotaxis protein
CUU60_07060	292	CP024795	NA	carbohydrate ABC transporter permease
CUU60_07065	296	CP024795	NA	sugar ABC transporter permease
CUU60_07070	560	CP024795	NA	sugar ABC transporter
CUU60_07100	628	CP024795	NA	tenascin
CUU60_07115	220	CP024795	NA	amylopullulanase
CUU60_07140	2972	CP024795	NA	polyketide synthase
CUU60_07145	4468	CP024795	NA	polyketide synthase
CUU60_07150	6589	CP024795	NA	polyketide synthase
CUU60_07155	3709	CP024795	NA	non-ribosomal peptide synthetase
CUU60_07160	249	CP024795	NA	enoyl-CoA hydratase
CUU60_07195	211	CP024795	NA	MBL fold metallo-hydrolase
CUU60_07255	343	CP024795	NA	glycosyl hydrolase
CUU60_07295	75	CP024795	NA	hypothetical protein
CUU60_07315	295	CP024795	NA	LysR family transcriptional regulator
CUU60_07350	321	CP024795	NA	sugar ABC transporter permease
CUU60_07355	299	CP024795	NA	carbohydrate ABC transporter permease
CUU60_07360	753	CP024795	NA	AraC family transcriptional regulator
CUU60_07420	323	CP024795	NA	RluA family pseudouridine synthase
CUU60_07435	115	CP024795	NA	hypothetical protein
CUU60_07540	467	CP024795	NA	UDP-N-acetylmuramoyl-tripeptide--D-alanyl-D- alanine ligase
CUU60_07550	638	CP024795	NA	stage V sporulation protein D
CUU60_07555	784	CP024795	NA	stage V sporulation protein D
CUU60_07585	311	CP024795	NA	ABC transporter ATP-binding protein
CUU60_07650	231	CP024795	NA	hypothetical protein
CUU60_07660	382	CP024795	NA	cysteine desulfurase
CUU60_07685	626	CP024795	NA	peptidase S8
CUU60_07695	491	CP024795	NA	PLP-dependent aminotransferase family protein
CUU60_07700	406	CP024795	NA	PLP-dependent aminotransferase family protein
CUU60_07730	377	CP024795	NA	RNA polymerase sigma factor RpoD
CUU60_07835	447	CP024795	NA	PLP-dependent aminotransferase family protein
CUU60_07865	459	CP024795	NA	class I SAM-dependent rRNA methyltransferase
CUU60_07910	398	CP024795	NA	NADP-dependent malic enzyme
CUU60_07920	235	CP024795	NA	two-component system response regulator DcuR
CUU60_07925	551	CP024795	NA	two-component system sensor histidine kinase DcuS
CUU60_07965	604	CP024795	NA	elongation factor 4
CUU60_08000	182	CP024795	NA	RNA polymerase subunit sigma
CUU60_08030	812	CP024795	NA	leucine--tRNA ligase
CUU60_08040	257	CP024795	NA	class I SAM-dependent methyltransferase
CUU60_08080	176	CP024795	NA	YqeG family HAD IIIA-type phosphatase
CUU60_08130	753	CP024795	NA	AraC family transcriptional regulator
CUU60_08135	513	CP024795	NA	ABC transporter substrate-binding protein
CUU60_08140	297	CP024795	NA	carbohydrate ABC transporter permease
CUU60_08145	330	CP024795	NA	sugar ABC transporter permease
CUU60_08150	258	CP024795	NA	NAD(P)-dependent oxidoreductase
CUU60_08155	295	CP024795	NA	EamA/RhaT family transporter
CUU60_08185	1529	CP024795	NA	hypothetical protein
CUU60_08260	980	CP024795	NA	formate dehydrogenase subunit alpha
CUU60_08285	813	CP024795	NA	AraC family transcriptional regulator
CUU60_08290	557	CP024795	NA	methyl-accepting chemotaxis protein
CUU60_08330	357	CP024795	NA	spermidine/putrescine ABC transporter substrate-binding protein
CUU60_08335	273	CP024795	NA	ABC transporter permease
CUU60_08340	270	CP024795	NA	ABC transporter permease
CUU60_08345	369	CP024795	NA	ABC transporter ATP-binding protein
CUU60_08350	378	CP024795	NA	amidohydrolase
CUU60_08470	249	CP024795	NA	short-chain dehydrogenase
CUU60_08475	573	CP024795	NA	ABC fe(3+) transporter permease
CUU60_08485	347	CP024795	NA	iron-siderophore ABC transporter substrate-binding protein
CUU60_08560	122	CP024795	NA	hypothetical protein
CUU60_08570	163	CP024795	NA	GNAT family N-acetyltransferase
CUU60_08605	150	CP024795	NA	GNAT family N-acetyltransferase
CUU60_08635	163	CP024795	NA	GNAT family N-acetyltransferase
CUU60_08685	687	CP024795	NA	methyl-accepting chemotaxis protein
CUU60_08695	795	CP024795	NA	geranyl transferase
CUU60_08735	581	CP024795	NA	methyl-accepting chemotaxis protein
CUU60_08765	767	CP024795	NA	beta-glucosidase
CUU60_08770	306	CP024795	NA	carbohydrate ABC transporter permease
CUU60_08775	309	CP024795	NA	sugar ABC transporter permease
CUU60_08785	507	CP024795	NA	DNA-binding response regulator
CUU60_08790	614	CP024795	NA	sensor histidine kinase
CUU60_08860	399	CP024795	NA	MFS transporter
CUU60_08865	586	CP024795	NA	methyl-accepting chemotaxis protein
CUU60_08870	531	CP024795	NA	S-layer protein
CUU60_08875	320	CP024795	NA	AraC family transcriptional regulator
CUU60_08885	327	CP024795	NA	sensor domain-containing diguanylate cyclase
CUU60_08900	278	CP024795	NA	chemotaxis protein
CUU60_08910	638	CP024795	NA	PTS beta-glucoside transporter subunit EIIBCA
CUU60_08915	275	CP024795	NA	transcription antiterminator LicT
CUU60_08930	147	CP024795	NA	molybdenum cofactor biosynthesis protein MoaE
CUU60_08935	339	CP024795	NA	thiamine biosynthesis protein ThiF
CUU60_08945	215	CP024795	NA	DNA-binding response regulator
CUU60_09000	368	CP024795	NA	TIGR04053 family radical SAM/SPASM domain-containing protein
CUU60_09045	361	CP024795	NA	WXG100 family type VII secretion target
CUU60_09090	261	CP024795	NA	isocitrate lyase/phosphoenolpyruvate mutase family protein
CUU60_09125	245	CP024795	NA	NAD(P)-dependent oxidoreductase
CUU60_09130	309	CP024795	NA	AraC family transcriptional regulator
CUU60_09140	345	CP024795	NA	LacI family transcriptional regulator
CUU60_09145	350	CP024795	NA	butanediol dehydrogenase
CUU60_09150	650	CP024795	NA	ABC transporter substrate-binding protein
CUU60_09155	447	CP024795	NA	GABA permease (4-amino butyrate transport carrier)
CUU60_09170	130	CP024795	NA	transcriptional regulator
CUU60_09235	746	CP024795	NA	carbohydrate-binding cenc domain protein
CUU60_09245	982	CP024795	NA	hypothetical protein
CUU60_09285	320	CP024795	NA	YafY family transcriptional regulator
CUU60_09290	1060	CP024795	NA	hypothetical protein
CUU60_09310	293	CP024795	NA	carbohydrate ABC transporter permease
CUU60_09330	586	CP024795	NA	sensor histidine kinase
CUU60_09365	193	CP024795	NA	flavodoxin family protein
CUU60_09370	194	CP024795	NA	TetR/AcrR family transcriptional regulator
CUU60_09375	223	CP024795	NA	hypothetical protein
CUU60_09400	355	CP024795	NA	ABC transporter ATP-binding protein
CUU60_09405	459	CP024795	NA	sensor histidine kinase
CUU60_09410	236	CP024795	NA	DNA-binding response regulator
CUU60_09460	541	CP024795	NA	serine protease
CUU60_09470	109	CP024795	NA	ArsR family transcriptional regulator
CUU60_09480	427	CP024795	NA	ATPase
CUU60_09485	386	CP024795	NA	MFS transporter
CUU60_09490	250	CP024795	NA	amino acid ABC transporter ATP-binding protein
CUU60_09495	222	CP024795	NA	amino acid ABC transporter permease
CUU60_09500	283	CP024795	NA	amino acid ABC transporter substrate-binding protein
CUU60_09505	430	CP024795	NA	MFS transporter
CUU60_09530	334	CP024795	NA	LLM class flavin-dependent oxidoreductase
CUU60_09630	303	CP024795	NA	serine/threonine protein kinase
CUU60_09640	254	CP024795	NA	DNA-binding response regulator
CUU60_09645	547	CP024795	NA	sensor histidine kinase
CUU60_09655	498	CP024795	NA	chemotaxis protein
CUU60_09675	717	CP024795	NA	cysteine ABC transporter ATP-binding protein
CUU60_09685	144	CP024795	NA	PTS mannitol transporter subunit IIA
CUU60_09690	692	CP024795	NA	transcriptional antiterminator
CUU60_09770	288	CP024795	NA	AraC family transcriptional regulator
CUU60_09775	339	CP024795	NA	L-glyceraldehyde 3-phosphate reductase
CUU60_09810	482	CP024795	NA	polysaccharide deacetylase family protein
CUU60_09815	384	CP024795	NA	AI-2E family transporter
CUU60_09825	749	CP024795	NA	methyl-accepting chemotaxis protein
CUU60_09830	443	CP024795	NA	collagenase-like protease
CUU60_09870	355	CP024795	NA	AI-2E family transporter
CUU60_09875	657	CP024795	NA	methyl-accepting chemotaxis protein
CUU60_09895	139	CP024795	NA	Rrf2 family transcriptional regulator
CUU60_09935	436	CP024795	NA	replication-associated recombination protein A
CUU60_09945	608	CP024795	NA	ABC transporter ATP-binding protein
CUU60_09960	592	CP024795	NA	aspartate--tRNA ligase
CUU60_09975	168	CP024795	NA	type 1 glutamine amidotransferase
CUU60_09995	682	CP024795	NA	methyl-accepting chemotaxis protein
CUU60_10000	170	CP024795	NA	adenine phosphoribosyltransferase
CUU60_10035	258	CP024795	NA	DUF421 domain-containing protein
CUU60_10065	335	CP024795	NA	Holliday junction branch migration DNA helicase RuvB
CUU60_10215	292	CP024795	NA	Zn-dependent protease
CUU60_10280	888	CP024795	NA	valine--tRNA ligase
CUU60_10290	303	CP024795	NA	RluA family pseudouridine synthase
CUU60_10400	272	CP024795	NA	carbohydrate ABC transporter permease
CUU60_10405	297	CP024795	NA	sugar ABC transporter permease
CUU60_10415	346	CP024795	NA	LacI family transcriptional regulator
CUU60_10430	493	CP024795	NA	PTS sugar transporter
CUU60_10435	452	CP024795	NA	carbohydrate ABC transporter substrate-binding protein
CUU60_10445	275	CP024795	NA	carbohydrate ABC transporter permease
CUU60_10450	510	CP024795	NA	radical SAM protein
CUU60_10470	278	CP024795	NA	DNA-binding response regulator
CUU60_10485	485	CP024795	NA	glycoside hydrolase family 1 protein
CUU60_10490	323	CP024795	NA	LacI family transcriptional regulator
CUU60_10495	282	CP024795	NA	transcription antiterminator BglG
CUU60_10500	618	CP024795	NA	PTS beta-glucoside transporter subunit EIIBCA
CUU60_10515	231	CP024795	NA	DNA-binding response regulator
CUU60_10535	234	CP024795	NA	response regulator
CUU60_10545	408	CP024795	NA	glycosyltransferase family 1 protein
CUU60_10550	417	CP024795	NA	transporter
CUU60_10595	322	CP024795	NA	LacI family transcriptional regulator
CUU60_10650	261	CP024795	NA	NAD(P)-dependent oxidoreductase
CUU60_10660	211	CP024795	NA	hypothetical protein
CUU60_10720	659	CP024795	NA	methyl-accepting chemotaxis protein
CUU60_10750	160	CP024795	NA	hypothetical protein
CUU60_10755	77	CP024795	NA	DNA-binding response regulator
CUU60_10775	426	CP024795	NA	type III PLP-dependent enzyme
CUU60_10780	362	CP024795	NA	gfo/Idh/MocA family oxidoreductase
CUU60_10805	330	CP024795	NA	multidrug ABC transporter ATP-binding protein
CUU60_10835	288	CP024795	NA	MurR/RpiR family transcriptional regulator
CUU60_10895	391	CP024795	NA	multidrug ABC transporter ATP-binding protein
CUU60_10905	363	CP024795	NA	glycosyltransferase family 2 protein
CUU60_10935	301	CP024795	NA	NAD(P)/FAD-dependent oxidoreductase
CUU60_10955	478	CP024795	NA	glycoside hydrolase family 1 protein
CUU60_10960	309	CP024795	NA	UDP-glucose 4-epimerase
CUU60_11005	399	CP024795	NA	glycosyl transferase
CUU60_11010	238	CP024795	NA	glycosyl transferase
CUU60_11020	284	CP024795	NA	NAD(P)-dependent oxidoreductase
CUU60_11025	328	CP024795	NA	UDP-N-acetylglucosamine 4,6-dehydratase
CUU60_11035	549	CP024795	NA	glycosyl transferase
CUU60_11070	487	CP024795	NA	glycosyltransferase family 2 protein
CUU60_11080	263	CP024795	NA	glycosyltransferase family 2 protein
CUU60_11100	596	CP024795	NA	histidine kinase
CUU60_11110	262	CP024795	NA	WIAG-tail domain
CUU60_11115	387	CP024795	NA	glycosyltransferase family 1 protein
CUU60_11120	375	CP024795	NA	endospore coat-associated protein yheD
CUU60_11130	261	CP024795	NA	AraC family transcriptional regulator
CUU60_11135	432	CP024795	NA	hypothetical protein
CUU60_11140	425	CP024795	NA	two-component sensor histidine kinase
CUU60_11150	248	CP024795	NA	ABC transporter ATP-binding protein
CUU60_11155	463	CP024795	NA	ATP-dependent helicase
CUU60_11160	259	CP024795	NA	NAD(P)-dependent oxidoreductase
CUU60_11180	246	CP024795	NA	GTP pyrophosphokinase
CUU60_11185	223	CP024795	NA	alpha/beta hydrolase
CUU60_11195	202	CP024795	NA	N-acetyltransferase
CUU60_11230	301	CP024795	NA	LysR family transcriptional regulator
CUU60_11280	396	CP024795	NA	NAD(P)/FAD-dependent oxidoreductase
CUU60_11345	309	CP024795	NA	EamA/RhaT family transporter
CUU60_11350	292	CP024795	NA	LysR family transcriptional regulator
CUU60_11360	256	CP024795	NA	S-layer homology domain-containing protein
CUU60_11375	355	CP024795	NA	NAD(P)/FAD-dependent oxidoreductase
CUU60_11395	280	CP024795	NA	MetQ/NlpA family lipoprotein
CUU60_11405	340	CP024795	NA	methionine ABC transporter ATP-binding protein
CUU60_11435	544	CP024795	NA	polysaccharide biosynthesis protein
CUU60_11450	692	CP024795	NA	cell division protein FtsI
CUU60_11455	693	CP024795	NA	cell division protein FtsI
CUU60_11470	389	CP024795	NA	MFS transporter
CUU60_11505	78	CP024795	NA	acid-soluble spore protein
CUU60_11570	310	CP024795	NA	aldo/keto reductase
CUU60_11575	278	CP024795	NA	carbohydrate ABC transporter permease
CUU60_11585	454	CP024795	NA	sugar ABC transporter substrate-binding protein
CUU60_11590	618	CP024795	NA	sensor histidine kinase
CUU60_11595	531	CP024795	NA	DNA-binding response regulator
CUU60_11620	201	CP024795	NA	AraC family transcriptional regulator
CUU60_11630	629	CP024795	NA	PTS beta-glucoside transporter subunit EIIBCA
CUU60_11640	479	CP024795	NA	6-phospho-beta-glucosidase
CUU60_11650	281	CP024795	NA	transketolase
CUU60_11655	311	CP024795	NA	transketolase
CUU60_11705	245	CP024795	NA	ABC transporter ATP-binding protein
CUU60_11710	490	CP024795	NA	efflux RND transporter periplasmic adaptor subunit
CUU60_11715	369	CP024795	NA	TolC family protein
CUU60_11725	259	CP024795	NA	ABC transporter ATP-binding protein
CUU60_11730	328	CP024795	NA	sensor histidine kinase
CUU60_11745	64	CP024795	NA	AraC family transcriptional regulator
CUU60_11760	262	CP024795	NA	RNA methyltransferase
CUU60_11795	216	CP024795	NA	DNA-binding response regulator
CUU60_11800	359	CP024795	NA	sensor histidine kinase
CUU60_11810	234	CP024795	NA	phage shock protein A
CUU60_11965	572	CP024795	NA	glycosyl hydrolase
CUU60_12075	237	CP024795	NA	phosphatase PAP2 family protein
CUU60_12100	257	CP024795	NA	RNA polymerase subunit sigma-70
CUU60_12115	556	CP024795	NA	hybrid sensor histidine kinase/response regulator
CUU60_12125	1238	CP024795	NA	histidine kinase
CUU60_12170	542	CP024795	NA	ABC transporter ATP-binding protein
CUU60_12175	277	CP024795	NA	ABC transporter ATP-binding protein
CUU60_12180	327	CP024795	NA	iron ABC transporter permease
CUU60_12190	1455	CP024795	NA	iron transporter
CUU60_12195	165	CP024795	NA	cell surface protein
CUU60_12215	334	CP024795	NA	iron ABC transporter permease
CUU60_12220	263	CP024795	NA	ABC transporter ATP-binding protein
CUU60_12245	184	CP024795	NA	transcriptional regulator
CUU60_12250	410	CP024795	NA	MFS transporter
CUU60_12260	488	CP024795	NA	amino acid permease
CUU60_12265	458	CP024795	NA	MFS transporter
CUU60_12270	375	CP024795	NA	transglutaminase
CUU60_12335	507	CP024795	NA	MFS transporter
CUU60_12340	681	CP024795	NA	heavy metal translocating P-type ATPase
CUU60_12390	448	CP024795	NA	beta-glucosidase A
CUU60_12405	300	CP024795	NA	carbohydrate ABC transporter permease
CUU60_12410	337	CP024795	NA	sugar ABC transporter permease
CUU60_12440	549	CP024795	NA	DNA-binding response regulator
CUU60_12445	596	CP024795	NA	two-component sensor histidine kinase
CUU60_12460	459	CP024795	NA	hypothetical protein
CUU60_12465	317	CP024795	NA	glycosyltransferase family 2 protein
CUU60_12470	313	CP024795	NA	glycosyltransferase family 2 protein
CUU60_12480	454	CP024795	NA	HlyC/CorC family transporter
CUU60_12495	303	CP024795	NA	aldo/keto reductase
CUU60_12505	326	CP024795	NA	ABC transporter
CUU60_12510	252	CP024795	NA	iron ABC transporter ATP-binding protein
CUU60_12520	317	CP024795	NA	iron ABC transporter permease
CUU60_12525	225	CP024795	NA	DNA-binding response regulator
CUU60_12530	305	CP024795	NA	sensor histidine kinase
CUU60_12535	225	CP024795	NA	ABC transporter ATP-binding protein
CUU60_12545	179	CP024795	NA	N-acetyltransferase
CUU60_12565	468	CP024795	NA	DNA-binding protein
CUU60_12610	354	CP024795	NA	sulfate ABC transporter substrate-binding protein
CUU60_12685	974	CP024795	NA	glycoside hydrolase family 81
CUU60_12705	111	CP024795	NA	transcriptional regulator
CUU60_12710	130	CP024795	NA	transcriptional regulator
CUU60_12730	177	CP024795	NA	MarR family transcriptional regulator
CUU60_12735	439	CP024795	NA	hypothetical protein
CUU60_12765	260	CP024795	NA	alpha/beta hydrolase
CUU60_12785	279	CP024795	NA	AraC family transcriptional regulator
CUU60_12805	473	CP024795	NA	efflux RND transporter periplasmic adaptor subunit
CUU60_12810	216	CP024795	NA	DNA-binding response regulator
CUU60_12815	410	CP024795	NA	sensor histidine kinase
CUU60_12830	487	CP024795	NA	sucrose-6-phosphate hydrolase
CUU60_12835	275	CP024795	NA	carbohydrate ABC transporter permease
CUU60_12840	294	CP024795	NA	sugar ABC transporter permease
CUU60_12865	5784	CP024795	NA	non-ribosomal peptide synthetase
CUU60_12870	577	CP024795	NA	ABC transporter ATP-binding protein
CUU60_12875	608	CP024795	NA	ABC transporter ATP-binding protein
CUU60_12885	4997	CP024795	NA	non-ribosomal peptide synthetase
CUU60_12930	762	CP024795	NA	hypothetical protein
CUU60_12945	474	CP024795	NA	hypothetical protein
CUU60_12995	188	CP024795	NA	RNA polymerase sigma factor SigW
CUU60_13110	368	CP024795	NA	MRP family ATP-binding protein
CUU60_13180	179	CP024795	NA	methionine aminopeptidase
CUU60_13335	204	CP024795	NA	class I SAM-dependent methyltransferase
CUU60_13435	457	CP024795	NA	DNA repair protein RadA
CUU60_13440	814	CP024795	NA	ATP-dependent Clp protease ATP-binding subunit
CUU60_13510	302	CP024795	NA	glycosyltransferase family 2 protein
CUU60_13515	314	CP024795	NA	glycosyltransferase family 2 protein
CUU60_13545	242	CP024795	NA	spore coat protein
CUU60_13555	1280	CP024795	NA	glycosyl transferase
CUU60_13570	435	CP024795	NA	ABC transporter ATP-binding protein
CUU60_13585	112	CP024795	NA	hypothetical protein
CUU60_13595	446	CP024795	NA	lantibiotic modifying enzyme
CUU60_13615	343	CP024795	NA	glycosyltransferase
CUU60_13630	146	CP024795	NA	N-acetyltransferase
CUU60_13635	637	CP024795	NA	copper amine oxidase
CUU60_13645	541	CP024795	NA	ferredoxin--nitrite reductase
CUU60_13675	75	CP024795	NA	aspartyl-phosphate phosphatase Spo0E family protein
CUU60_13680	467	CP024795	NA	DNA-binding protein
CUU60_13685	465	CP024795	NA	DNA-binding protein
CUU60_13715	427	CP024795	NA	hypothetical protein
CUU60_13755	139	CP024795	NA	GtrA family protein
CUU60_13760	335	CP024795	NA	glycosyltransferase
CUU60_13790	420	CP024795	NA	acetylornithine transaminase
CUU60_13815	299	CP024795	NA	YitT family protein
CUU60_13850	315	CP024795	NA	NAD-dependent dehydratase
CUU60_13875	331	CP024795	NA	polysaccharide biosynthesis protein
CUU60_13980	386	CP024795	NA	histidine kinase
CUU60_13985	905	CP024795	NA	copper amine oxidase
CUU60_13990	469	CP024795	NA	efflux RND transporter periplasmic adaptor subunit
CUU60_13995	1038	CP024795	NA	AcrB/AcrD/AcrF family protein
CUU60_14020	510	CP024795	NA	copper amine oxidase
CUU60_14030	448	CP024795	NA	efflux RND transporter periplasmic adaptor subunit
CUU60_14090	332	CP024795	NA	rod shape-determining protein
CUU60_14100	246	CP024795	NA	M23 family peptidase
CUU60_14195	293	CP024795	NA	sugar ABC transporter permease
CUU60_14245	366	CP024795	NA	redox-regulated ATPase YchF
CUU60_14265	234	CP024795	NA	Crp/Fnr family transcriptional regulator
CUU60_14290	113	CP024795	NA	QacE family quaternary ammonium compound efflux SMR transporter
CUU60_14295	104	CP024795	NA	QacE family quaternary ammonium compound efflux SMR transporter
CUU60_14300	310	CP024795	NA	phosphofructokinase
CUU60_14360	164	CP024795	NA	N-acetyltransferase
CUU60_14365	415	CP024795	NA	MFS transporter
CUU60_14380	453	CP024795	NA	NADH oxidase
CUU60_14395	339	CP024795	NA	LLM class flavin-dependent oxidoreductase
CUU60_14400	381	CP024795	NA	AI-2E family transporter
CUU60_14405	337	CP024795	NA	LytR family transcriptional regulator
CUU60_14410	314	CP024795	NA	cation transporter
CUU60_14485	204	CP024795	NA	TetR/AcrR family transcriptional regulator
CUU60_14505	251	CP024795	NA	amino acid ABC transporter ATP-binding protein
CUU60_14515	221	CP024795	NA	amino acid ABC transporter permease
CUU60_14555	149	CP024795	NA	regulator
CUU60_14620	384	CP024795	NA	spore gernimation protein
CUU60_14630	405	CP024795	NA	Ger(x)C family spore germination protein
CUU60_14635	541	CP024795	NA	spore germination protein
CUU60_14660	662	CP024795	NA	methyl-accepting chemotaxis protein
CUU60_14680	279	CP024795	NA	DNA-binding response regulator
CUU60_14685	131	CP024795	NA	transcriptional repressor
CUU60_14695	368	CP024795	NA	hypothetical protein
CUU60_14705	391	CP024795	NA	Ger(x)C family spore germination protein
CUU60_14710	544	CP024795	NA	spore germination protein
CUU60_14715	363	CP024795	NA	GGDEF domain-containing protein
CUU60_14730	156	CP024795	NA	AbrB/MazE/SpoVT family DNA-binding domain-containing protein
CUU60_14770	239	CP024795	NA	3-ketoacyl-ACP reductase
CUU60_14775	145	CP024795	NA	regulator
CUU60_14800	352	CP024795	NA	ABC transporter ATP-binding protein
CUU60_14805	262	CP024795	NA	ABC transporter permease
CUU60_14860	457	CP024795	NA	hypothetical protein
CUU60_14870	948	CP024795	NA	hypothetical protein
CUU60_14885	201	CP024795	NA	hypothetical protein
CUU60_14910	169	CP024795	NA	MarR family transcriptional regulator
CUU60_14920	358	CP024795	NA	GGDEF domain-containing protein
CUU60_14930	309	CP024795	NA	LysR family transcriptional regulator
CUU60_14970	211	CP024795	NA	NAD(P)-dependent oxidoreductase
CUU60_14985	402	CP024795	NA	IS110 family transposase
CUU60_15000	383	CP024795	NA	winged helix family transcriptional regulator
CUU60_15010	258	CP024795	NA	2-deoxy-D-gluconate 3-dehydrogenase
CUU60_15025	318	CP024795	NA	sugar kinase
CUU60_15030	337	CP024795	NA	LacI family transcriptional regulator
CUU60_15035	469	CP024795	NA	MATE family efflux transporter
CUU60_15055	274	CP024795	NA	carbohydrate ABC transporter permease
CUU60_15060	288	CP024795	NA	sugar ABC transporter permease
CUU60_15065	410	CP024795	NA	ABC transporter substrate-binding protein
CUU60_15080	242	CP024795	NA	ABC transporter ATP-binding protein
CUU60_15090	392	CP024795	NA	MFS transporter
CUU60_15095	319	CP024795	NA	acetylesterase
CUU60_15105	277	CP024795	NA	carbohydrate ABC transporter permease
CUU60_15110	294	CP024795	NA	sugar ABC transporter permease
CUU60_15130	349	CP024795	NA	transcriptional regulator
CUU60_15155	265	CP024795	NA	peptidylprolyl isomerase
CUU60_15165	393	CP024795	NA	NAD(P)/FAD-dependent oxidoreductase
CUU60_15175	131	CP024795	NA	sulfurtransferase
CUU60_15210	278	CP024795	NA	chemotaxis protein
CUU60_15215	291	CP024795	NA	DNA-binding protein
CUU60_15235	307	CP024795	NA	carbohydrate ABC transporter permease
CUU60_15240	326	CP024795	NA	sugar ABC transporter permease
CUU60_15255	543	CP024795	NA	DNA-binding response regulator
CUU60_15270	397	CP024795	NA	NAD(P)/FAD-dependent oxidoreductase
CUU60_15280	234	CP024795	NA	Crp/Fnr family transcriptional regulator
CUU60_15290	236	CP024795	NA	MBL fold metallo-hydrolase
CUU60_15305	246	CP024795	NA	phosphate ABC transporter ATP-binding protein
CUU60_15320	303	CP024795	NA	AraC family transcriptional regulator
CUU60_15335	314	CP024795	NA	AraC family transcriptional regulator
CUU60_15365	308	CP024795	NA	ABC transporter ATP-binding protein
CUU60_15370	467	CP024795	NA	radical SAM/SPASM domain-containing protein
CUU60_15375	576	CP024795	NA	ABC transporter ATP-binding protein
CUU60_15385	434	CP024795	NA	sugar ABC transporter substrate-binding protein
CUU60_15395	619	CP024795	NA	sensor histidine kinase
CUU60_15400	298	CP024795	NA	sugar ABC transporter permease
CUU60_15405	276	CP024795	NA	carbohydrate ABC transporter permease
CUU60_15410	400	CP024795	NA	GTP-binding protein
CUU60_15435	318	CP024795	NA	polysaccharide deacetylase
CUU60_15470	513	CP024795	NA	beta-xylosidase
CUU60_15480	469	CP024795	NA	glycoside hydrolase family 1 protein
CUU60_15525	466	CP024795	NA	XRE family transcriptional regulator
CUU60_15540	315	CP024795	NA	gfo/Idh/MocA family oxidoreductase
CUU60_15570	273	CP024795	NA	ABC transporter ATP-binding protein
CUU60_15590	259	CP024795	NA	ABC transporter ATP-binding protein
CUU60_15595	305	CP024795	NA	ABC transporter ATP-binding protein
CUU60_15605	309	CP024795	NA	ABC transporter permease
CUU60_15640	298	CP024795	NA	AraC family transcriptional regulator
CUU60_15670	528	CP024795	NA	histidine kinase
CUU60_15700	304	CP024795	NA	LysR family transcriptional regulator
CUU60_15705	246	CP024795	NA	3-ketoacyl-ACP reductase
CUU60_15710	260	CP024795	NA	endospore coat-associated protein YheC
CUU60_15740	314	CP024795	NA	YafY family transcriptional regulator
CUU60_15770	328	CP024795	NA	aldo/keto reductase
CUU60_15785	231	CP024795	NA	DNA-binding response regulator
CUU60_15795	253	CP024795	NA	ABC transporter ATP-binding protein
CUU60_15820	320	CP024795	NA	radical SAM protein
CUU60_15835	502	CP024795	NA	aminotransferase class V-fold PLP-dependent enzyme
CUU60_15845	350	CP024795	NA	LLM class flavin-dependent oxidoreductase
CUU60_15885	665	CP024795	NA	PTS mannose transporter subunit IIABC
CUU60_15900	185	CP024795	NA	N-acetyltransferase
CUU60_15960	353	CP024795	NA	LLM class flavin-dependent oxidoreductase
CUU60_15965	193	CP024795	NA	TetR/AcrR family transcriptional regulator
CUU60_15985	196	CP024795	NA	sigma-70 family RNA polymerase sigma factor
CUU60_16000	236	CP024795	NA	NAD(P)-dependent oxidoreductase
CUU60_16020	520	CP024795	NA	DUF1835 domain-containing protein
CUU60_16050	664	CP024795	NA	penicillin-binding protein
CUU60_16105	154	CP024795	NA	VOC family protein
CUU60_16110	307	CP024795	NA	YafY family transcriptional regulator
CUU60_16120	572	CP024795	NA	methyl-accepting chemotaxis protein
CUU60_16155	275	CP024795	NA	short-chain dehydrogenase/reductase
CUU60_16165	309	CP024795	NA	daunorubicin resistance protein DrrA family ABC transporter ATP-binding protein
CUU60_16220	411	CP024795	NA	serine protease
CUU60_16245	609	CP024795	NA	cell wall metabolism sensor histidine kinase WalK
CUU60_16250	243	CP024795	NA	DNA-binding response regulator
CUU60_16255	507	CP024795	NA	M23 family peptidase
CUU60_16310	321	CP024795	NA	ABC transporter ATP-binding protein
CUU60_16315	327	CP024795	NA	ABC transporter ATP-binding protein
CUU60_16320	307	CP024795	NA	ABC transporter permease
CUU60_16325	320	CP024795	NA	ABC transporter permease
CUU60_16330	579	CP024795	NA	ABC transporter substrate-binding protein
CUU60_16475	362	CP024795	NA	HD-GYP domain-containing protein
CUU60_16555	84	CP024795	NA	AbrB/MazE/SpoVT family DNA-binding domain-containing protein
CUU60_16565	256	CP024795	NA	TatD family deoxyribonuclease
CUU60_16570	382	CP024795	NA	hypothetical protein
CUU60_16760	191	CP024795	NA	aminodeoxychorismate/anthranilate synthase component II
CUU60_16820	486	CP024795	NA	long-chain fatty acid--CoA ligase
CUU60_16875	462	CP024795	NA	D-alanyl-D-alanine carboxypeptidase
CUU60_16915	185	CP024795	NA	N-acetyltransferase
CUU60_16925	758	CP024795	NA	PAS domain-containing sensor histidine kinase
CUU60_16930	233	CP024795	NA	23S rRNA pseudouridine(2604) synthase RluF
CUU60_16985	168	CP024795	NA	PTS glucose transporter subunit IIA
CUU60_17005	130	CP024795	NA	VOC family protein
CUU60_17030	430	CP024795	NA	MFS transporter
CUU60_17035	579	CP024795	NA	ABC transporter ATP-binding protein
CUU60_17040	583	CP024795	NA	ABC transporter ATP-binding protein
CUU60_17045	296	CP024795	NA	LysR family transcriptional regulator
CUU60_17070	332	CP024795	NA	ABC transporter ATP-binding protein
CUU60_17080	556	CP024795	NA	iron ABC transporter permease
CUU60_17105	122	CP024795	NA	response regulator
CUU60_17140	582	CP024795	NA	DNA polymerase III subunit gamma/tau
CUU60_17235	374	CP024795	NA	ABC transporter ATP-binding protein
CUU60_17260	383	CP024795	NA	acyltransferase
CUU60_17320	316	CP024795	NA	glucokinase
CUU60_17350	369	CP024795	NA	hypothetical protein
CUU60_17420	75	CP024795	NA	hypothetical protein
CUU60_17440	471	CP024795	NA	hypothetical protein
CUU60_17450	173	CP024795	NA	hypothetical protein
CUU60_17455	138	CP024795	NA	DUF4280 domain-containing protein
CUU60_17475	382	CP024795	NA	glycosyl transferase
CUU60_17480	240	CP024795	NA	GntR family transcriptional regulator
CUU60_17490	280	CP024795	NA	aldo/keto reductase
CUU60_17515	1246	CP024795	NA	alpha-L-arabinofuranosidase
CUU60_17545	329	CP024795	NA	alcohol dehydrogenase
CUU60_17560	752	CP024795	NA	glycosyl hydrolase
CUU60_17565	297	CP024795	NA	AraC family transcriptional regulator
CUU60_17580	1014	CP024795	NA	beta-galactosidase
CUU60_17585	274	CP024795	NA	carbohydrate ABC transporter permease
CUU60_17590	298	CP024795	NA	sugar ABC transporter permease
CUU60_17600	604	CP024795	NA	sensor histidine kinase
CUU60_17605	521	CP024795	NA	DNA-binding response regulator
CUU60_17620	699	CP024795	NA	pectate lyase
CUU60_17630	987	CP024795	NA	ATP-dependent helicase
CUU60_17640	372	CP024795	NA	spore gernimation protein
CUU60_17645	384	CP024795	NA	Ger(x)C family spore germination protein
CUU60_17650	492	CP024795	NA	spore germination protein
CUU60_17665	335	CP024795	NA	LacI family transcriptional regulator
CUU60_17670	554	CP024795	NA	PTS transporter subunit IICB
CUU60_17680	399	CP024795	NA	MFS transporter
CUU60_17695	160	CP024795	NA	MarR family transcriptional regulator
CUU60_17700	309	CP024795	NA	transcriptional regulator
CUU60_17705	434	CP024795	NA	sensor histidine kinase
CUU60_17725	539	CP024795	NA	ABC transporter substrate-binding protein
CUU60_17735	281	CP024795	NA	ABC transporter permease
CUU60_17740	345	CP024795	NA	ABC transporter ATP-binding protein
CUU60_17745	321	CP024795	NA	ABC transporter ATP-binding protein
CUU60_17755	344	CP024795	NA	ABC transporter permease
CUU60_17775	290	CP024795	NA	sugar ABC transporter permease
CUU60_17780	276	CP024795	NA	carbohydrate ABC transporter permease
CUU60_17785	278	CP024795	NA	AraC family transcriptional regulator
CUU60_17805	338	CP024795	NA	alcohol dehydrogenase AdhP
CUU60_17810	121	CP024795	NA	transcriptional regulator
CUU60_17815	398	CP024795	NA	MFS transporter
CUU60_17820	280	CP024795	NA	aldo/keto reductase
CUU60_17830	491	CP024795	NA	sucrose-6-phosphate hydrolase
CUU60_17840	262	CP024795	NA	AraC family transcriptional regulator
CUU60_17865	401	CP024795	NA	Ger(x)C family spore germination protein
CUU60_17870	531	CP024795	NA	spore germination protein
CUU60_17880	811	CP024795	NA	glycoside hydrolase
CUU60_17915	137	CP024795	NA	GntR family transcriptional regulator
CUU60_17920	237	CP024795	NA	ABC transporter ATP-binding protein
CUU60_17945	334	CP024795	NA	LacI family transcriptional regulator
CUU60_17955	724	CP024795	NA	beta-glucosidase BglX
CUU60_17960	417	CP024795	NA	ABC transporter substrate-binding protein
CUU60_17965	294	CP024795	NA	sugar ABC transporter permease
CUU60_17970	284	CP024795	NA	carbohydrate ABC transporter permease
CUU60_17975	195	CP024795	NA	sigma-70 family RNA polymerase sigma factor
CUU60_17980	580	CP024795	NA	ABC transporter ATP-binding protein
CUU60_18015	504	CP024795	NA	alpha-N-arabinofuranosidase
CUU60_18045	133	CP024795	NA	GtrA family protein
CUU60_18050	363	CP024795	NA	glycosyltransferase
CUU60_18060	228	CP024795	NA	DNA-binding response regulator
CUU60_18065	498	CP024795	NA	sensor histidine kinase
CUU60_18080	307	CP024795	NA	alpha/beta hydrolase
CUU60_18085	183	CP024795	NA	MarR family transcriptional regulator
CUU60_18105	424	CP024795	NA	sugar ABC transporter substrate-binding protein
CUU60_18110	293	CP024795	NA	sugar ABC transporter permease
CUU60_18115	296	CP024795	NA	carbohydrate ABC transporter permease
CUU60_18140	320	CP024795	NA	ROK family protein
CUU60_18165	443	CP024795	NA	ABC transporter substrate-binding protein
CUU60_18170	296	CP024795	NA	sugar ABC transporter permease
CUU60_18175	274	CP024795	NA	carbohydrate ABC transporter permease
CUU60_18180	598	CP024795	NA	two-component sensor histidine kinase
CUU60_18185	394	CP024795	NA	DNA-binding response regulator
CUU60_18190	301	CP024795	NA	LysR family transcriptional regulator
CUU60_18195	196	CP024795	NA	phenolic acid decarboxylase
CUU60_18215	386	CP024795	NA	serine hydrolase
CUU60_18220	778	CP024795	NA	cadherin
CUU60_18240	343	CP024795	NA	ABC transporter ATP-binding protein
CUU60_18245	308	CP024795	NA	ABC transporter ATP-binding protein
CUU60_18260	606	CP024795	NA	oligopeptide ABC transporter substrate-binding protein
CUU60_18275	219	CP024795	NA	amino acid ABC transporter permease
CUU60_18285	242	CP024795	NA	polar amino acid ABC transporter ATP-binding protein
CUU60_18310	293	CP024795	NA	AraC family transcriptional regulator
CUU60_18330	136	CP024795	NA	HxlR family transcriptional regulator
CUU60_18350	616	CP024795	NA	HD family phosphohydrolase
CUU60_18360	409	CP024795	NA	Bcr/CflA family drug resistance efflux transporter
CUU60_18390	316	CP024795	NA	ABC transporter ATP-binding protein
CUU60_18420	353	CP024795	NA	EAL domain-containing protein
CUU60_18445	340	CP024795	NA	methionine ABC transporter ATP-binding protein
CUU60_18450	221	CP024795	NA	ABC transporter permease
CUU60_18455	1170	CP024795	NA	hypothetical protein
CUU60_18460	1046	CP024795	NA	transcriptional regulator
CUU60_18465	383	CP024795	NA	two-component system response regulator
CUU60_18475	224	CP024795	NA	DNA-binding response regulator
CUU60_18480	476	CP024795	NA	sensor histidine kinase
CUU60_18510	273	CP024795	NA	serine/threonine protein kinase
CUU60_18525	231	CP024795	NA	GntR family transcriptional regulator
CUU60_18660	336	CP024795	NA	LytR family transcriptional regulator
CUU60_18680	486	CP024795	NA	sensor histidine kinase
CUU60_18695	208	CP024795	NA	nitroreductase family protein
CUU60_18705	253	CP024795	NA	AAA family ATPase
CUU60_18715	400	CP024795	NA	tetracycline resistance MFS efflux pump
CUU60_18760	584	CP024795	NA	methyl-accepting chemotaxis protein
CUU60_18795	218	CP024795	NA	DUF421 domain-containing protein
CUU60_18805	472	CP024795	NA	transcriptional regulator
CUU60_18810	115	CP024795	NA	HxlR family transcriptional regulator
CUU60_18815	248	CP024795	NA	oxidoreductase
CUU60_18825	166	CP024795	NA	hypothetical protein
CUU60_18830	282	CP024795	NA	hypothetical protein
CUU60_18835	168	CP024795	NA	hypothetical protein
CUU60_18850	472	CP024795	NA	transcriptional regulator
CUU60_18860	280	CP024795	NA	transcriptional regulator
CUU60_18880	129	CP024795	NA	hypothetical protein
CUU60_18905	253	CP024795	NA	NAD(P)-dependent oxidoreductase
CUU60_18920	337	CP024795	NA	SIS domain-containing protein
CUU60_18925	260	CP024795	NA	fructoselysine 6-kinase
CUU60_18945	313	CP024795	NA	hypothetical protein
CUU60_18995	122	CP024795	NA	VOC family protein
CUU60_19010	151	CP024795	NA	MarR family transcriptional regulator
CUU60_19040	175	CP024795	NA	RNA polymerase
CUU60_19060	316	CP024795	NA	bile acid:sodium symporter family protein
CUU60_19065	374	CP024795	NA	NADH-dependent flavin oxidoreductase
CUU60_19070	195	CP024795	NA	N-acetyltransferase
CUU60_19075	550	CP024795	NA	DNA-binding response regulator
CUU60_19080	604	CP024795	NA	sensor histidine kinase
CUU60_19085	293	CP024795	NA	sugar ABC transporter permease
CUU60_19090	278	CP024795	NA	carbohydrate ABC transporter permease
CUU60_19095	431	CP024795	NA	carbohydrate ABC transporter substrate-binding protein
CUU60_19105	314	CP024795	NA	YafY family transcriptional regulator
CUU60_19110	1041	CP024795	NA	ATP-dependent helicase
CUU60_19150	489	CP024795	NA	MFS transporter
CUU60_19155	140	CP024795	NA	MarR family transcriptional regulator
CUU60_19160	192	CP024795	NA	TetR family transcriptional regulator
CUU60_19165	407	CP024795	NA	MFS transporter
CUU60_19190	256	CP024795	NA	NAD(P)-dependent oxidoreductase
CUU60_19195	293	CP024795	NA	metal ABC transporter substrate-binding protein
CUU60_19210	593	CP024795	NA	sensor histidine kinase
CUU60_19215	516	CP024795	NA	DNA-binding response regulator
CUU60_19220	318	CP024795	NA	sugar ABC transporter permease
CUU60_19230	559	CP024795	NA	ABC transporter substrate-binding protein
CUU60_19255	253	CP024795	NA	SDR family oxidoreductase
CUU60_19260	811	CP024795	NA	DNA helicase UvrD
CUU60_19300	318	CP024795	NA	RNA polymerase subunit sigma
CUU60_19325	345	CP024795	NA	serine hydrolase
CUU60_19365	321	CP024795	NA	ABC transporter ATP-binding protein
CUU60_19370	300	CP024795	NA	sodium ABC transporter ATP-binding protein
CUU60_19410	404	CP024795	NA	ROK family protein
CUU60_19425	153	CP024795	NA	nucleoside deaminase
CUU60_19440	326	CP024795	NA	aldo/keto reductase
CUU60_19445	283	CP024795	NA	aldo/keto reductase
CUU60_19455	336	CP024795	NA	alcohol dehydrogenase
CUU60_19465	244	CP024795	NA	NAD(P)-dependent oxidoreductase
CUU60_19480	293	CP024795	NA	AraC family transcriptional regulator
CUU60_19495	327	CP024795	NA	endoglucanase
CUU60_19515	221	CP024795	NA	ArsR family transcriptional regulator
CUU60_19560	189	CP024795	NA	sugar O-acetyltransferase
CUU60_19565	184	CP024795	NA	XRE family transcriptional regulator
CUU60_19580	654	CP024795	NA	PTS beta-glucoside transporter subunit EIIBCA
CUU60_19600	551	CP024795	NA	spore germination protein
CUU60_19605	809	CP024795	NA	nitrite reductase large subunit
CUU60_19620	1296	CP024795	NA	peptidase m28
CUU60_19630	566	CP024795	NA	spore germination protein
CUU60_19635	364	CP024795	NA	spore gernimation protein
CUU60_19640	399	CP024795	NA	Ger(x)C family spore germination protein
CUU60_19660	131	CP024795	NA	HxlR family transcriptional regulator
CUU60_19675	589	CP024795	NA	two-component sensor histidine kinase
CUU60_19685	164	CP024795	NA	DedA family protein
CUU60_19720	208	CP024795	NA	nitroreductase family protein
CUU60_19725	319	CP024795	NA	ring-cleaving dioxygenase
CUU60_19730	1122	CP024795	NA	helicase SNF
CUU60_19745	304	CP024795	NA	AraC family transcriptional regulator
CUU60_19770	426	CP024795	NA	sugar ABC transporter substrate-binding protein
CUU60_19775	294	CP024795	NA	sugar ABC transporter permease
CUU60_19780	275	CP024795	NA	carbohydrate ABC transporter permease
CUU60_19800	1099	CP024795	NA	hypothetical protein
CUU60_19815	512	CP024795	NA	PLP-dependent aminotransferase family protein
CUU60_19825	194	CP024795	NA	TetR family transcriptional regulator
CUU60_19835	403	CP024795	NA	MFS transporter
CUU60_19865	303	CP024795	NA	YafY family transcriptional regulator
CUU60_19875	154	CP024795	NA	AbrB/MazE/SpoVT family DNA-binding domain-containing protein
CUU60_19890	254	CP024795	NA	MerR family transcriptional regulator
CUU60_19925	519	CP024795	NA	ABC transporter ATP-binding protein
CUU60_19930	504	CP024795	NA	MFS transporter
CUU60_19945	154	CP024795	NA	MarR family transcriptional regulator
CUU60_19965	446	CP024795	NA	amino acid permease
CUU60_19975	322	CP024795	NA	SIS domain-containing protein
CUU60_19980	270	CP024795	NA	fructoselysine 6-kinase
CUU60_19985	237	CP024795	NA	GntR family transcriptional regulator
CUU60_20010	579	CP024795	NA	sensor histidine kinase
CUU60_20040	273	CP024795	NA	AraC family transcriptional regulator
CUU60_20045	730	CP024795	NA	alpha-galactosidase
CUU60_20050	479	CP024795	NA	PTS sugar transporter
CUU60_20120	278	CP024795	NA	YitT family protein
CUU60_20160	592	CP024795	NA	sensor histidine kinase
CUU60_20175	302	CP024795	NA	sugar ABC transporter permease
CUU60_20180	279	CP024795	NA	carbohydrate ABC transporter permease
CUU60_20185	370	CP024795	NA	GDSL family lipase
CUU60_20205	439	CP024795	NA	glutamate-1-semialdehyde 2,1-aminomutase
CUU60_20215	346	CP024795	NA	daunorubicin ABC transporter ATP-binding protein
CUU60_20245	369	CP024795	NA	spore gernimation protein
CUU60_20250	402	CP024795	NA	Ger(x)C family spore germination protein
CUU60_20255	513	CP024795	NA	spore germination protein
CUU60_20260	218	CP024795	NA	DedA family protein
CUU60_20275	376	CP024795	NA	gfo/Idh/MocA family oxidoreductase
CUU60_20285	157	CP024795	NA	transcriptional regulator
CUU60_20320	711	CP024795	NA	DNA topoisomerase III
CUU60_20395	204	CP024795	NA	phosphoribosylglycinamide formyltransferase
CUU60_20415	285	CP024795	NA	cysteine ABC transporter substrate-binding protein
CUU60_20420	215	CP024795	NA	amino acid ABC transporter permease
CUU60_20440	334	CP024795	NA	iron ABC transporter permease
CUU60_20445	326	CP024795	NA	iron citrate ABC transporter substrate-binding protein
CUU60_20450	242	CP024795	NA	two-component system response regulator
CUU60_20490	430	CP024795	NA	carbohydrate ABC transporter substrate-binding protein
CUU60_20500	279	CP024795	NA	carbohydrate ABC transporter permease
CUU60_20505	428	CP024795	NA	threonine dehydratase
CUU60_20510	324	CP024795	NA	arabinan endo-1,5-alpha-L-arabinosidase
CUU60_20515	361	CP024795	NA	iron ABC transporter permease
CUU60_20520	341	CP024795	NA	iron ABC transporter permease
CUU60_20525	315	CP024795	NA	iron-hydroxamate ABC transporter substrate-binding protein
CUU60_20580	242	CP024795	NA	amino acid ABC transporter ATP-binding protein
CUU60_20665	207	CP024795	NA	TetR/AcrR family transcriptional regulator
CUU60_20700	148	CP024795	NA	VOC family protein
CUU60_20710	254	CP024795	NA	short-chain dehydrogenase
CUU60_20715	460	CP024795	NA	amino acid permease
CUU60_20745	224	CP024795	NA	NAD(P)H-dependent oxidoreductase
CUU60_20750	126	CP024795	NA	transcriptional regulator
CUU60_20755	330	CP024795	NA	iron(3+)-hydroxamate-binding protein yxeB
CUU60_20785	377	CP024795	NA	sensor histidine kinase
CUU60_20790	199	CP024795	NA	DNA-binding response regulator
CUU60_20810	341	CP024795	NA	methionine ABC transporter ATP-binding protein
CUU60_20815	220	CP024795	NA	ABC transporter permease
CUU60_20820	295	CP024795	NA	methionine ABC transporter substrate-binding protein
CUU60_20885	402	CP024795	NA	MFS transporter
CUU60_20900	324	CP024795	NA	hypothetical protein
CUU60_20920	597	CP024795	NA	ABC transporter ATP-binding protein
CUU60_20925	196	CP024795	NA	hypothetical protein
CUU60_20930	442	CP024795	NA	ATP-binding protein
CUU60_20945	325	CP024795	NA	aldo/keto reductase
CUU60_20985	198	CP024795	NA	thiamine ABC transporter permease
CUU60_20990	494	CP024795	NA	ABC transporter
CUU60_21000	241	CP024795	NA	ABC transporter
CUU60_21005	223	CP024795	NA	ABC transporter permease
CUU60_21025	163	CP024795	NA	N-acetyltransferase
CUU60_21030	327	CP024795	NA	gfo/Idh/MocA family oxidoreductase
CUU60_21045	160	CP024795	NA	S-layer homology domain-containing protein
CUU60_21050	162	CP024795	NA	RTX toxin
CUU60_21125	5249	CP024795	NA	non-ribosomal peptide synthetase
CUU60_21135	4180	CP024795	NA	non-ribosomal peptide synthetase
CUU60_21140	435	CP024795	NA	MFS transporter
CUU60_21150	311	CP024795	NA	ABC transporter permease
CUU60_21155	303	CP024795	NA	ABC transporter ATP-binding protein
CUU60_21160	594	CP024795	NA	response regulator receiver protein
CUU60_21170	197	CP024795	NA	stress protein
CUU60_21175	191	CP024795	NA	chemical-damaging agent resistance protein C
CUU60_21180	193	CP024795	NA	chemical-damaging agent resistance protein C
CUU60_21250	316	CP024795	NA	ABC transporter permease
CUU60_21260	255	CP024795	NA	amino acid ABC transporter substrate-binding protein
CUU60_21265	219	CP024795	NA	amino acid ABC transporter permease
CUU60_21270	250	CP024795	NA	amino acid ABC transporter ATP-binding protein
CUU60_21275	299	CP024795	NA	AraC family transcriptional regulator
CUU60_21300	295	CP024795	NA	AraC family transcriptional regulator
CUU60_21305	450	CP024795	NA	MATE family efflux transporter
CUU60_21310	230	CP024795	NA	TetR family transcriptional regulator
CUU60_21325	314	CP024795	NA	copper amine oxidase
CUU60_21340	194	CP024795	NA	RNA polymerase sigma factor
CUU60_21350	348	CP024795	NA	LacI family transcriptional regulator
CUU60_21370	485	CP024795	NA	glycoside hydrolase
CUU60_21375	1085	CP024795	NA	beta-fructosidase
CUU60_21380	578	CP024795	NA	ABC transporter ATP-binding protein
CUU60_21385	612	CP024795	NA	ABC transporter ATP-binding protein
CUU60_21390	399	CP024795	NA	MFS transporter
CUU60_21395	218	CP024795	NA	TetR/AcrR family transcriptional regulator
CUU60_21405	466	CP024795	NA	MFS transporter
CUU60_21415	481	CP024795	NA	sensor histidine kinase
CUU60_21420	332	CP024795	NA	sugar ABC transporter substrate-binding protein
CUU60_21425	504	CP024795	NA	alpha-glucosidase/alpha-galactosidase
CUU60_21430	717	CP024795	NA	cellobiohydrolase
CUU60_21440	129	CP024795	NA	GntR family transcriptional regulator
CUU60_21445	300	CP024795	NA	ABC transporter ATP-binding protein
CUU60_21470	287	CP024795	NA	aldo/keto reductase
CUU60_21495	507	CP024795	NA	copper amine oxidase
CUU60_21520	424	CP024795	NA	methyl-accepting chemotaxis protein
CUU60_21535	263	CP024795	NA	NAD(P)-dependent oxidoreductase
CUU60_21635	465	CP024795	NA	transcriptional regulator
CUU60_21645	407	CP024795	NA	acyltransferase
CUU60_21650	335	CP024795	NA	sugar ABC transporter substrate-binding protein
CUU60_21660	433	CP024795	NA	DNA-binding response regulator
CUU60_21670	115	CP024795	NA	XRE family transcriptional regulator
CUU60_21700	67	CP024795	NA	XRE family transcriptional regulator
CUU60_21705	361	CP024795	NA	sugar ABC transporter substrate-binding protein
CUU60_21710	516	CP024795	NA	sugar ABC transporter ATP-binding protein
CUU60_21720	301	CP024795	NA	NAD(P)-dependent oxidoreductase
CUU60_21755	589	CP024795	NA	phosphatase PAP2 family protein
CUU60_21775	277	CP024795	NA	AraC family transcriptional regulator
CUU60_21815	327	CP024795	NA	transcriptional regulator
CUU60_21935	1036	CP024795	NA	cyclic peptide export ABC transporter
CUU60_21965	1640	CP024795	NA	hypothetical protein
CUU60_21970	403	CP024795	NA	aspartate aminotransferase
CUU60_21990	2377	CP024795	NA	non-ribosomal peptide synthetase
CUU60_22000	3770	CP024795	NA	non-ribosomal peptide synthetase
CUU60_22005	1289	CP024795	NA	non-ribosomal peptide synthetase
CUU60_22010	551	CP024795	NA	ABC transporter substrate-binding protein
CUU60_22015	334	CP024795	NA	ABC transporter permease
CUU60_22050	270	CP024795	NA	cell wall hydrolase
CUU60_22075	214	CP024795	NA	DNA-binding response regulator
CUU60_22085	212	CP024795	NA	tyrosine protein kinase
CUU60_22095	232	CP024795	NA	sugar transferase
CUU60_22100	311	CP024795	NA	glycosyltransferase family 2 protein
CUU60_22110	256	CP024795	NA	glycosyltransferase
CUU60_22120	459	CP024795	NA	hypothetical protein
CUU60_22145	442	CP024795	NA	UDP-glucose/GDP-mannose dehydrogenase family protein
CUU60_22150	458	CP024795	NA	mannose-1-phosphate guanylyltransferase
CUU60_22180	225	CP024795	NA	capsular biosynthesis protein
CUU60_22190	312	CP024795	NA	GDP-L-fucose synthase
CUU60_22240	306	CP024795	NA	ABC transporter ATP-binding protein
CUU60_22250	361	CP024795	NA	AI-2E family transporter
CUU60_22270	314	CP024795	NA	YitT family protein
CUU60_22310	621	CP024795	NA	ABC transporter ATP-binding protein
CUU60_22470	111	CP024795	NA	hypothetical protein
CUU60_22500	84	CP024795	NA	hypothetical protein
CUU60_22505	125	CP024795	NA	hypothetical protein
CUU60_22510	75	CP024795	NA	hypothetical protein
CUU60_22515	59	CP024795	NA	hypothetical protein
CUU60_22520	135	CP024795	NA	hypothetical protein
CUU60_22555	83	CP024795	NA	hypothetical protein
CUU60_22660	222	CP024795	NA	phage tail tape measure protein
CUU60_22735	110	CP024795	NA	DNA-entry nuclease
CUU60_22810	17	CP024795	NA	hypothetical protein
CUU60_22815	293	CP024795	NA	AraC family transcriptional regulator
CUU60_22845	273	CP024795	NA	carbohydrate ABC transporter permease
CUU60_22850	455	CP024795	NA	ABC transporter substrate-binding protein
CUU60_22855	194	CP024795	NA	TetR/AcrR family transcriptional regulator
CUU60_22860	454	CP024795	NA	HlyD family secretion protein
CUU60_22870	864	CP024795	NA	glycine/betaine-binding protein
CUU60_22875	407	CP024795	NA	glycine betaine/L-proline ABC transporter ATP-binding protein
CUU60_22905	307	CP024795	NA	ABC transporter ATP-binding protein
CUU60_22910	314	CP024795	NA	sensor histidine kinase
CUU60_22915	235	CP024795	NA	DNA-binding response regulator
CUU60_22930	573	CP024795	NA	iron-hydroxamate ABC transporter substrate-binding protein
CUU60_22990	291	CP024795	NA	Cof-type HAD-IIB family hydrolase
CUU60_23015	151	CP024795	NA	MarR family transcriptional regulator
CUU60_23045	161	CP024795	NA	glutathione peroxidase
CUU60_23075	402	CP024795	NA	MFS transporter
CUU60_23090	139	CP024795	NA	organic hydroperoxide resistance protein
CUU60_23115	254	CP024795	NA	metal ABC transporter ATP-binding protein
CUU60_23240	353	CP024795	NA	sulfate ABC transporter ATP-binding protein
CUU60_23250	502	CP024795	NA	PLP-dependent aminotransferase family protein
CUU60_23255	303	CP024795	NA	EamA family transporter
CUU60_23290	348	CP024795	NA	iron ABC transporter permease
CUU60_23295	278	CP024795	NA	ABC transporter ATP-binding protein
CUU60_23320	567	CP024795	NA	methyl-accepting chemotaxis protein
CUU60_23335	633	CP024795	NA	PTS beta-glucoside transporter subunit EIIBCA
CUU60_23350	362	CP024795	NA	aminopeptidase P family protein
CUU60_23355	254	CP024795	NA	MBL fold metallo-hydrolase
CUU60_23405	337	CP024795	NA	RluA family pseudouridine synthase
CUU60_23475	344	CP024795	NA	NAD(P)/FAD-dependent oxidoreductase
CUU60_23490	326	CP024795	NA	iron-uptake system-binding protein
CUU60_23495	335	CP024795	NA	iron ABC transporter permease
CUU60_23500	340	CP024795	NA	iron ABC transporter permease
CUU60_23505	256	CP024795	NA	enterobactin esterase
CUU60_23525	363	CP024795	NA	helix-turn-helix transcriptional regulator
CUU60_23565	403	CP024795	NA	lysophospholipase
CUU60_23580	186	CP024795	NA	N-acetyltransferase
CUU60_23590	252	CP024795	NA	DUF2087 domain-containing protein
CUU60_23630	423	CP024795	NA	MFS transporter
CUU60_23640	431	CP024795	NA	dihydrolipoyllysine-residue succinyltransferase
CUU60_23685	175	CP024795	NA	phosphatase PAP2 family protein
CUU60_23690	412	CP024795	NA	glycosyl transferase family 2
CUU60_23720	359	CP024795	NA	ABC transporter permease
CUU60_23775	367	CP024795	NA	PAS domain-containing sensor histidine kinase
CUU60_23780	713	CP024795	NA	GGDEF-domain containing protein
CUU60_23790	394	CP024795	NA	site-specific integrase
CUU60_23885	85	CP024795	NA	hypothetical protein
CUU60_23965	88	CP024795	NA	hypothetical protein
CUU60_24015	141	CP024795	NA	holin
CUU60_24070	789	CP024795	NA	endonuclease MutS2
CUU60_24110	403	CP024795	NA	aromatic amino acid aminotransferase
CUU60_24145	304	CP024795	NA	fructokinase
CUU60_24160	408	CP024795	NA	site-specific integrase
CUU60_24175	145	CP024795	NA	XRE family transcriptional regulator
CUU60_24180	152	CP024795	NA	hypothetical protein
CUU60_24335	2346	CP024795	NA	hypothetical protein
CUU60_24355	126	CP024795	NA	type II toxin-antitoxin system PemK/MazF family toxin
CUU60_24455	394	CP024795	NA	cystathionine gamma-synthase
CUU60_24460	392	CP024795	NA	cystathionine gamma-synthase
CUU60_24495	191	CP024795	NA	hypothetical protein
CUU60_24510	229	CP024795	NA	DNA-binding response regulator
CUU60_24545	82	CP024795	NA	AbrB family transcriptional regulator
CUU60_24550	355	CP024795	NA	exopolysaccharide biosynthesis protein
CUU60_24610	453	CP024795	NA	sensor histidine kinase
CUU60_24615	233	CP024795	NA	DNA-binding response regulator
CUU60_24630	527	CP024795	NA	sensor histidine kinase
CUU60_24650	239	CP024795	NA	DNA-binding response regulator
CUU60_24655	356	CP024795	NA	sensor histidine kinase
CUU60_24660	307	CP024795	NA	ABC transporter ATP-binding protein
CUU60_24665	235	CP024795	NA	ABC transporter permease
CUU60_24670	244	CP024795	NA	lantibiotic ABC transporter permease
CUU60_24685	421	CP024795	NA	lantibiotic biosynthesis protein
CUU60_24690	225	CP024795	NA	winged helix family transcriptional regulator
CUU60_24695	1084	CP024795	NA	lantibiotic biosynthesis protein
CUU60_24700	633	CP024795	NA	ABC transporter ATP-binding protein
CUU60_24720	182	CP024795	NA	DNA-binding protein
CUU60_24745	541	CP024795	NA	glycosyl hydrolase
CUU60_24785	331	CP024795	NA	Fe3+-citrate ABC transporter substrate-binding protein
CUU60_24800	391	CP024795	NA	MFS transporter
CUU60_24820	443	CP024795	NA	XRE family transcriptional regulator
CUU60_24825	457	CP024795	NA	transcriptional regulator
CUU60_24880	490	CP024795	NA	amidase
CUU60_24890	447	CP024795	NA	XRE family transcriptional regulator
CUU60_24950	407	CP024795	NA	cysteine desulfurase
CUU60_24970	279	CP024795	NA	manganese catalase
CUU60_24990	386	CP024795	NA	HD-GYP domain-containing protein
CUU60_25020	357	CP024795	NA	glycosyltransferase family 2 protein
CUU60_25050	368	CP024795	NA	endospore coat-associated protein
CUU60_25060	384	CP024795	NA	endospore coat-associated protein
CUU60_25065	459	CP024795	NA	hypothetical protein
CUU60_25085	165	CP024795	NA	hypothetical protein
CUU60_25095	1221	CP024795	NA	DNA polymerase III subunit alpha
CUU60_25190	289	CP024795	NA	NAD(P)-dependent oxidoreductase
CUU60_25200	243	CP024795	NA	DNA-binding response regulator
CUU60_25205	374	CP024795	NA	chemotaxis protein
CUU60_25295	660	CP024795	NA	AraC family transcriptional regulator
CUU60_25300	564	CP024795	NA	methyl-accepting chemotaxis protein
CUU60_25305	136	CP024795	NA	DUF4183 domain-containing protein
CUU60_25315	224	CP024795	NA	Crp/Fnr family transcriptional regulator
CUU60_25340	642	CP024795	NA	PTS fructose transporter subunit IIC
CUU60_25345	296	CP024795	NA	LysR family transcriptional regulator
CUU60_25360	285	CP024795	NA	transcription antiterminator BglG
CUU60_25370	469	CP024795	NA	glycoside hydrolase family 1 protein
CUU60_25420	376	CP024795	NA	copper amine oxidase
CUU60_25555	141	CP024795	NA	holin
CUU60_25575	107	CP024795	NA	YtxH domain-containing protein
CUU60_25585	417	CP024795	NA	peptidase M14
CUU60_25625	406	CP024795	NA	MFS transporter
CUU60_25725	456	CP024795	NA	MATE family efflux transporter
CUU60_25740	273	CP024795	NA	YitT family protein
CUU60_25745	525	CP024795	NA	ATP-dependent helicase
CUU60_25810	209	CP024795	NA	TlpA family protein disulfide reductase
CUU60_25840	270	CP024795	NA	GTP pyrophosphokinase
CUU60_25865	393	CP024795	NA	GGDEF domain-containing protein
CUU60_25870	374	CP024795	NA	glycosyltransferase family 1 protein
CUU60_25880	201	CP024795	NA	DedA family protein
CUU60_25925	251	CP024795	NA	N-acetylmuramoyl-L-alanine amidase
CUU60_25965	320	CP024795	NA	YafY family transcriptional regulator
CUU60_25975	411	CP024795	NA	MFS transporter
CUU60_26020	447	CP024795	NA	sugar ABC transporter substrate-binding protein
CUU60_26025	296	CP024795	NA	sugar ABC transporter permease
CUU60_26030	280	CP024795	NA	carbohydrate ABC transporter permease
CUU60_26035	461	CP024795	NA	arabinan endo-1,5-alpha-L-arabinosidase
CUU60_26060	141	CP024795	NA	VOC family protein
CUU60_26070	411	CP024795	NA	tetracycline resistance MFS efflux pump
CUU60_26105	563	CP024795	NA	ABC transporter substrate-binding protein
CUU60_26135	389	CP024795	NA	glycosyltransferase family 1 protein
CUU60_26165	282	CP024795	NA	copper amine oxidase
CUU60_26170	425	CP024795	NA	carbohydrate ABC transporter substrate-binding protein
CUU60_26175	567	CP024795	NA	methyl-accepting chemotaxis protein
CUU60_26190	309	CP024795	NA	AraC family transcriptional regulator
CUU60_26205	572	CP024795	NA	methyl-accepting chemotaxis protein
CUU60_26215	399	CP024795	NA	MFS transporter
CUU60_26245	1231	CP024795	NA	non-ribosomal peptide synthetase
CUU60_26250	589	CP024795	NA	methyl-accepting chemotaxis protein
CUU60_26270	153	CP024795	NA	MarR family transcriptional regulator
CUU60_26280	577	CP024795	NA	hybrid sensor histidine kinase/response regulator
CUU60_26325	383	CP024795	NA	lactaldehyde reductase
CUU60_26330	140	CP024795	NA	transcriptional regulator
CUU60_26360	675	CP024795	NA	beta-galactosidase
CUU60_26385	171	CP024795	NA	accessory regulator AgrB
CUU60_26440	329	CP024795	NA	ketoacyl-ACP synthase III
CUU60_26450	249	CP024795	NA	3-oxoacyl-[acyl-carrier-protein] reductase
CUU60_26475	338	CP024795	NA	signal recognition particle-docking protein FtsY
CUU60_26705	121	CP024795	NA	response regulator
CUU60_26750	514	CP024795	NA	chemotaxis response regulator protein-glutamate methylesterase
CUU60_26780	262	CP024795	NA	FliA/WhiG family RNA polymerase sigma factor
CUU60_26850	482	CP024795	NA	proline--tRNA ligase
CUU60_26960	302	CP024796	NA	copper amine oxidase
CUU60_26980	457	CP024796	NA	XRE family transcriptional regulator
CUU60_27015	300	CP024796	NA	recombinase XerC
CUU60_27055	293	CP024796	NA	copper amine oxidase
